# Supplementary material for: High piezoelectricity of Eu3+-doped Pb(Mg1/3Nb2/3)O3–0.25PbTiO3 transparent ceramics
Source: Royal Society of Chemistry journal article supplement (doi:10.1039/d0tc05351a), 2021-01-01
Supplement: d0tc05351a1.pdf [file d0tc05351a1.pdf]

## Supplementary Material

### High piezoelectricity of $\text{Eu}^{3+}$ -doped $\text{Pb}(\text{Mg}_{1/3}\text{Nb}_{2/3})\text{O}_3$ -0.25 $\text{PbTiO}_3$ transparent ceramics

Kai Li<sup>1</sup>, Enwei Sun<sup>1,\*</sup>, Yongcheng Zhang<sup>2,\*</sup>, Zhenzhen Song<sup>2</sup>, Xudong Qi<sup>1</sup>, Yuan Sun<sup>1</sup>,  
Jiaming Li<sup>1</sup>, Bin Yang<sup>1,\*</sup>, Jian Liu<sup>1</sup>, Wenwu Cao<sup>1,3</sup>

<sup>1</sup>Condensed Matter Science and Technology Institute, School of Instrumentation Science and Engineering, Harbin Institute of Technology, Harbin 150080, China

<sup>2</sup>College of Physics and University-Industry Joint Center for Ocean Observation and Broadband Communication, Qingdao University, Qingdao 266071, China

<sup>3</sup>Department of Mathematics and Materials Research Institute, The Pennsylvania State University, University Park, Pennsylvania 16802, USA

\*Corresponding authors. E-mail addresses: sunew@hit.edu.cn (E. Sun), qdzhyc@qdu.edu.cn (Y. Zhang), binyang@hit.edu.cn (B. Yang)

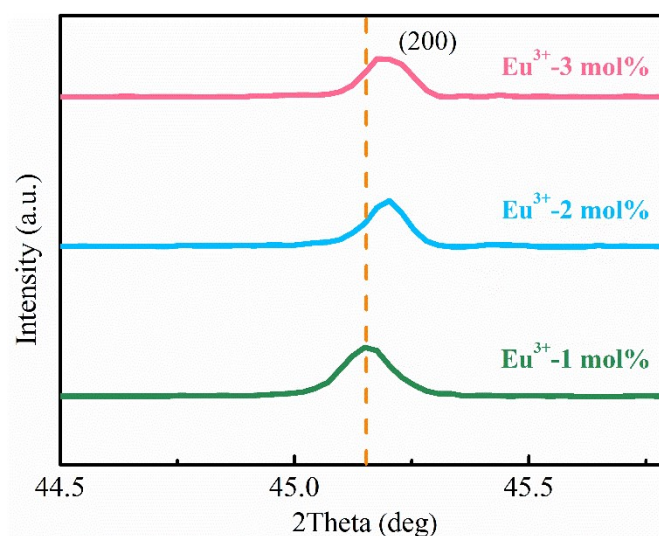

Fig. S1. The enlarged XRD patterns of  $\text{Eu}^{3+}$  doped PMN-PT transparent ceramics with the  $2\theta$  ranging from  $44.5^\circ$  to  $45.8^\circ$ .

The Vogel-Fulcher (V-F) relation is given by<sup>1,2</sup>:

$$f = f_0 \exp\left[\frac{-E_a}{k(T_m - T_f)}\right] \quad (\text{S1})$$

where  $f_0$ ,  $f$ ,  $T_m$  and  $k$  are the Debye frequency, measurement frequency, temperature corresponding to the maximum dielectric constant, and the Boltzmann constant. The  $E_a$  and  $T_f$  are the activation energy of local polarization and static freezing temperature of the thermal activation behavior of electric dipoles, i.e., the transition temperature between macro-domain and micro-domain structures. For relaxor ferroelectrics, when the temperature is above  $T_f$ , macro-domains disappear while polar nanoregions develop. When temperature is below  $T_f$  the polar nanoregion dynamics will be frozen and the system will be in the low-temperature ferroelectric (FE) phase. In PMN-0.25PT:Eu<sup>3+</sup> ceramics, the relationship between  $T_m$  and  $f$  was fitted by Eq. (S1), as seen in Fig. S2 (a)-(c). The corresponding parameters are obtained and listed in Table S1.

In addition, the dielectric quadratic relation is suggested as follows<sup>3</sup>:

$$\frac{\varepsilon_A}{\varepsilon} - 1 = \frac{(T - T_A)^2}{2\delta^2} \quad (\text{S2})$$

where the value of the fitting  $\delta$  parameter represents the diffuse degree of phase transition. Fig. S2(d)-(f) illustrate the temperature and frequency dependence of dielectric permittivity and the fitting using Eq. (S2) for PMN-0.25PT:Eu<sup>3+</sup> ceramics. Obviously, the experimental data were fitted well and the parameters were listed in Table S1. Furthermore, the  $\Delta T_m$  ( $\Delta T_m = T_m$  (100 kHz) -  $T_m$  (100 Hz)) was also

calculated and listed in Table S1. We can see that the degree of dielectric relaxation is stronger for higher  $\text{Eu}^{3+}$  doping amount.

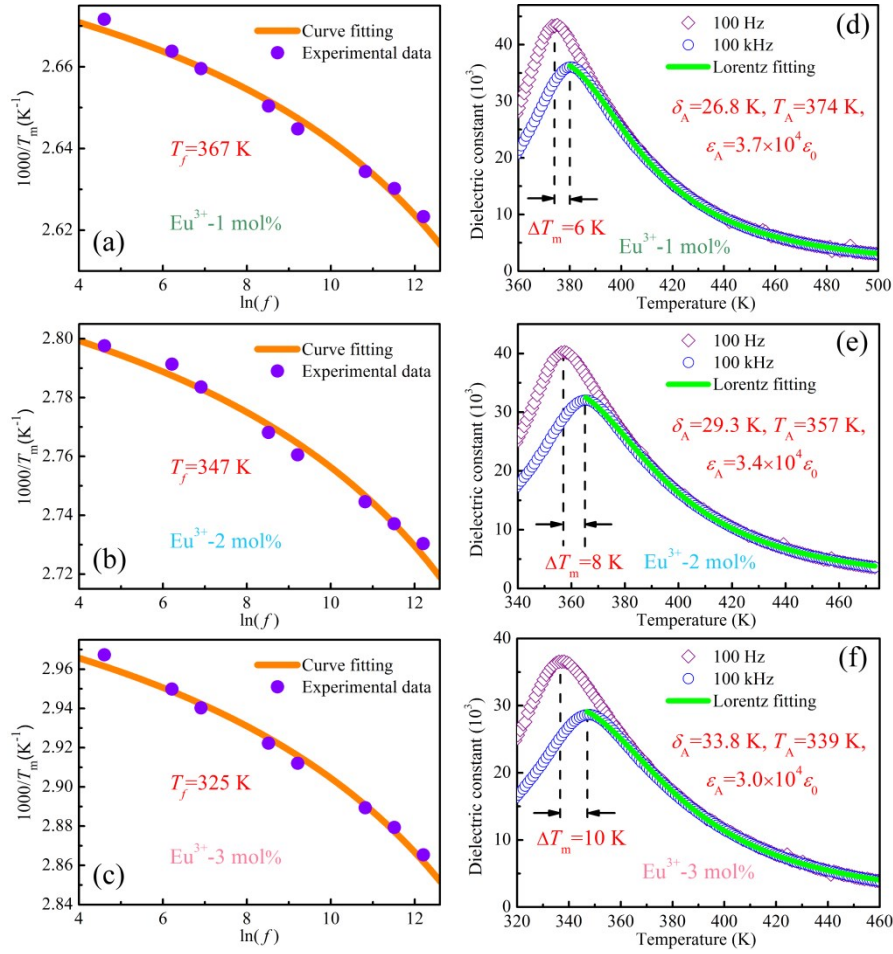

Fig. S2. The Vogel-Fulcher law and Lorentz-type relation fitting results for PMN-0.25PT:Eu<sup>3+</sup> ceramics, (a), (d) 1 mol% Eu<sup>3+</sup>, (b), (e) 2 mol% Eu<sup>3+</sup> and (c), (f) 3 mol% Eu<sup>3+</sup>.

**Table S1** The values of  $\Delta T_m$  and fitting parameters for Eu<sup>3+</sup>-doped PMN-0.25PT ceramics.

| Eu <sup>3+</sup> (mol%) | $f_0$ (10 <sup>5</sup> kHz) | $E_a/k$ (K) | $T_f$ (K) | $\Delta T_m$ (K) | $\delta$ (K) | $T_A$ (K) | $\epsilon_A$ (10 <sup>3</sup> $\epsilon_0$ ) |
|-------------------------|-----------------------------|-------------|-----------|------------------|--------------|-----------|----------------------------------------------|
| 1                       | 9.6                         | 122         | 367       | 6                | 26.8         | 374       | 37                                           |
| 2                       | 9.8                         | 166         | 347       | 8                | 29.3         | 357       | 34                                           |
| 3                       | 10                          | 212         | 325       | 10               | 33.8         | 339       | 30                                           |

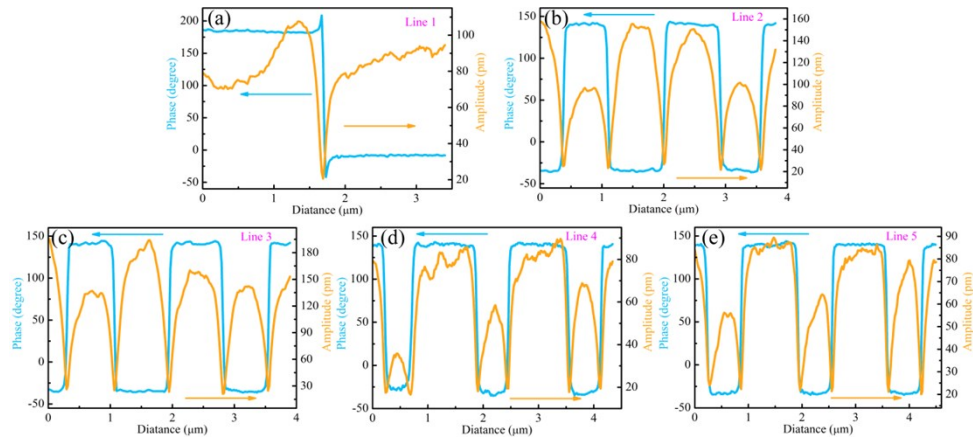

Fig. S3. The piezoresponse amplitude and phase degree of the line scanning across the domain patterns of 2mol%  $\text{Eu}^{3+}$ -doped PMN-0.25PT transparent ceramics.

The piezoelectric coefficients ( $d_{33}$ ) of various transparent ferroelectric ceramics shown in Fig.4 were taken from ref. 4-18.

## References

- 1 S. M. Gupta and D. Viehland, *J. Am. Ceram. Soc.*, 1997, **80**, 477–485.
- 2 X. D. Qi, Y. Zhao, E. W. Sun, J. Du, K. Li, Y. Sun, B. Yang, R. Zhang and W. W. Cao, *J. Eur. Ceram. Soc.*, 2019, **39**, 4060–4069.
- 3 T. Zheng, L. H. Luo, P. Du, A. M. Deng and W. P. Li, *J. Eur. Ceram. Soc.*, 2017, **38**, 575–583.
- 4 I. Fujii, S. Nakashima and T. Wada, *J. Am. Ceram. Soc.*, 2019, **102**, 1240–1248.
- 5 K. Yan, X. L. Chen, F. F. Wang and K. J. Zhu, *Appl. Phys. Lett.*, 2020, **116**, 082902.
- 6 K. B. Chu, Y. Shi, K. Li, B. J. Fang and J. J. Ding, *J. Phys. Chem. Solids.*, 2015, **81**, 10–14.
- 7 B. K. Wang, X. X. Tian, Z. Xu, S. B. Qu and Z. R. Li, *Acta. Phys. Sin-ch Ed.*,

- 2012, **19**, 197703.
- 8 J. F. Lin, J. Xu, C. W. Liu, Y. H. Lin, X. Wu, C. Lin, X. H. Zheng and C. Chen, *J. Alloy. Comp.*, 2019, **784**, 60–67.
  - 9 A. Rahmana, S. Parka, Y. Mina, G. T. Hwanga, J. J. Choia, B. D. Hahna, K. H. Chob, S. Nahmd and C. W. Ahna, *J. Eur. Ceram. Soc.*, 2020, **40**, 2989–2995.
  - 10 X. S. Zhang, D. Yang, Z. Y. Yang, X. M. Zhao, Q. Z. Chai, X. L. Chao, L. L. Wei and Z. P. Yang. *Ceram. Int.*, 2016, **42**, 17963–17971.
  - 11 Z. M. Geng, K. Li, D. L. Shi, L. L. Zhang and X. Y. Shi, *J. Mater. Sci-Mater. El.*, 2015, **26**, 6769–6775.
  - 12 D. Yang, C. Ma, Z. P. Yang. L. L. Wei, X. L. Chao, Z. Y. Yang and J. L. Yang, *Ceram. Int.*, 2016, **42**, 4648–4657.
  - 13 C. Huang, J. M. Xu, Z. Fang, D. Ai, W. Zhou, L. Zhao, J. Sun and Q. Wang, *J. Alloy. Comp.*, 2017, **723**, 602–610.
  - 14 X. D. Ren, Z. H. Peng, B. Chen, Q. Q. Shi, X. S. Qiao, D. Wu, G. R. Li, L. Jin, Z. P. Yang and X. L. Chao, *J. Eur. Ceram. Soc.*, 2020, **40**, 2331–2337.
  - 15 X. M. Zhao, Q. Z. Chai, B. Chen, X. L. Chao and Z. P. Yang. *J. Am. Ceram. Soc.*, 2018, **101**, 5127–5137.
  - 16 S. Y. Cao, F. Gao, J. Xu, J. H. Zhu, Q. Chen, Y. T. Guo, L. L. Li, J. T. Liu, T. Gao, E. Pawlikowska, M. Szafran and G. H. Cheng, *J. Eur. Ceram. Soc.*, 2019, **39**, 5260–5266.
  - 17 X. Wu, C. C. Fang, J. F. Lin, C. W. Liu, L. H. Luo, M. Lin, X. H. Zheng and C. Lin, *Ceram. Int.*, 2018, **44**, 4908–4914.

18 X. M. Zhao, X. L. Chao, D. Wu, P. F. Liang and Z. P. Yang, *J. Am. Ceram. Soc.*  
2019, **102**, 3498–3509.
